# Supplementary material for: Molecular engineering of thermally activated delayed fluorescence emitters to concurrently achieve high performance and reduced efficiency roll-off in organic light-emitting diodes
Source: Royal Society of Chemistry journal article supplement (doi:10.1039/c9tc02186h), 2019-01-01
Supplement: c9tc02186h1.pdf [file c9tc02186h1.pdf]

## Supporting Information For

### **Molecular Engineering of Thermally Activated Delayed Fluorescence Emitters to Concurrently Achieve High Performance and Reduced Efficiency Roll-off in Organic Light-Emitting Diodes**

*Bowen Li, Zhiyi Li, Xiaofang Wei, Fengyun Guo, Ying Wang\*, Liancheng Zhao and Yong Zhang\**

# **1. Experimental Procedures**

## **1.1 General Information**

## **1.2 Quantum Chemical Calculations**

## **1.3 Electrochemical Characterization**

## **1.4 Photophysical Characterization**

## **1.5 OLED Fabrication and Measurements**

## **1.6 Synthetic Procedures**

# **2. Supplementary Equations, Figures, and Tables**

## **2.1 Figures**

## **2.2 Tables**

# **3. References**

# 1. Experimental Procedures

## 1.1 General information

All reagents and solvents used for the synthesis of the compound were purchased from commercial source and used without further purification.

## 1.2 Quantum Chemical Calculations

All of the theoretical simulations for the investigated molecules were performed using the Gaussian 09 program package. The electron density distribution of frontier molecular orbital (FMO) were visualized with Gaussview 3.0. Structure optimizations were carried out using density functional theory (DFT) calculations. The ground state structures were optimized with B3LYP/6-31G (d) level set in the gas phase.

## 1.3 Electrochemical Characterization

The oxidation potential was determined by cyclic voltammetry using 0.1 M tetrabutylammonium hexafluorophosphate (TBAPF<sub>6</sub>) in CH<sub>2</sub>Cl<sub>2</sub> (CV) as a supporting electrolyte and a scan rate of 100 mV s<sup>-1</sup>. ITO, Ag/AgCl and Pt mesh were used as working electrode, reference electrode and counter electrode, respectively. A 3-electrode cell comprising silver/silver chloride (Ag/AgCl), a platinum mesh and ITO as the reference, counter, and working electrodes, respectively, were used. All potentials were recorded versus Ag/AgCl (saturated) as a reference electrode. Oxidation of the ferrocene/ferrocenium (Fc/Fc<sup>+</sup>) redox couple in CH<sub>2</sub>Cl<sub>2</sub>/TBAPF<sub>6</sub> occurs at  $E'_o = + 0.48$  V. HOMO levels were conducted from the oxidation half-wave potential with the formula:  $E_{\text{HOMO}} = - (E_{\text{oxi. v.s. Fc}^+/\text{Fc}} + 4.8)$  (eV),  $E_{\text{LUMO}} = E_{\text{HOMO}} + E_{\text{g}}^{\text{opt}}$ , thereinto,  $E_{\text{g}}^{\text{opt}}$  was obtained from the absorption edges of normalized absorption spectra.

## 1.4 Photophysical Characterization

Absorption spectra were studied using a UV-vis-NIR spectrophotometer (UV-1650 PC, Shimadzu). Photoluminescence (PL) spectra and phosphorescence spectra were performed at

77 K using a HITACHI F-4600 spectrophotometer. The transient photoluminance decay characteristics were measured using an Edinburgh Instruments FLS920 spectrometer. The temperature dependence experiment is conducted under low temperature refrigeration system from Advanced Research Systems Company. The absolute fluorescence quantum yields of the solid films are measured with an integrating sphere.

## 1.5 OLED Fabrication and Characterization

OLEDs were fabricated on patterned ITO-coated glass substrates with a sheet resistance of  $15 \Omega/\square$ . Before device fabrication, the ITO glass substrates were cleaned with Decon 90, rinsed in de-ionized water, dried in an oven at  $120^\circ\text{C}$ , treated with UV-ozone, and transferred to a vacuum deposition system with a base pressure better than  $1 \times 10^{-6}$  mbar for organic and metal deposition. The devices were fabricated by evaporating organic onto the ITO glass sequentially with an evaporation rate of  $1\text{--}2 \text{ \AA s}^{-1}$ . The cathode was completed through thermal deposition of LiF at a deposition rate of  $0.04\text{--}0.05 \text{ \AA s}^{-1}$ , and then capped with Al metal through thermal evaporation at a rate of  $10 \text{ \AA s}^{-1}$ . EL luminescence spectra and CIE color coordinates were measured with a Spectrascan PR650 photometer and the current-voltage characteristics were measured with a computer-controlled Keithley 2400 SourceMeter under ambient atmosphere.

## 1.6 Synthetic procedure

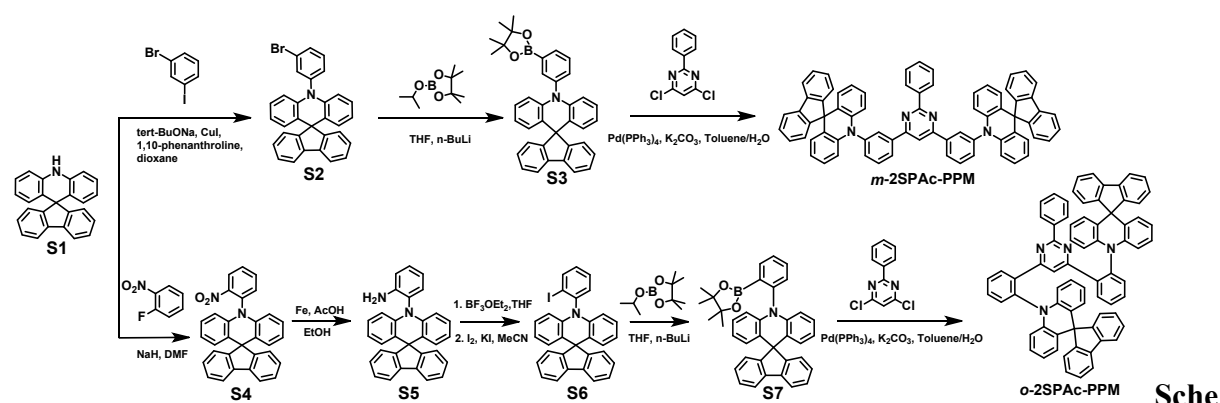

**me S1.** Synthetic routes of *o*-2SPAc-PPM and *m*-2SPAc-PPM.

Compounds S1, S2, S3, S6, and S7 are synthesized according to our previous work.<sup>[S1]</sup>

**Synthesis of *o*-2SPAc-PPM:** A mixture of **S7** (1.20 g, 2.55 mmol), 4,6-dichloro-2-phenylpyrimidine (0.211 g, 0.9 mmol) in toluene (55 mL), an aqueous solution (10 mL) of potassium carbonate (0.933 g, 6.75 mmol) and 10 mL anhydrous alcohol was added to the mixture, which was stirred, bubbled using N<sub>2</sub> for 40 min, and Pd(PPh<sub>3</sub>)<sub>4</sub> (0.078 g, 0.0675 mmol) was added quickly, then refluxed under nitrogen atmosphere for 6 h. After cooling to room temperature, the reaction mixture was extracted with chloroform and the solvent was removed under reduced pressure. The crude product was washed twice with CH<sub>2</sub>Cl<sub>2</sub> and recrystallized using THF to give *o*-2SPAc-PPM as a light-yellow solid (yield = 0.72 g, 81%). This compound was further purified by temperature-gradient sublimation under vacuum. <sup>1</sup>H NMR (400 MHz, CDCl<sub>3</sub>): δ(ppm) 7.71 (t, *J* = 7.4 Hz, 2H), 7.64 (t, *J* = 8.4 Hz, 4H), 7.59 (d, *J* = 7.4 Hz, 2H), 7.55 (s, 1H), 7.51 (d, *J* = 6.4 Hz, 4H), 7.41 (d, *J* = 7.7 Hz, 2H), 7.29 – 7.22 (m, 4H), 7.16 – 7.04 (m, 5H), 6.88 (t, *J* = 7.4 Hz, 2H), 6.78 (t, *J* = 7.6 Hz, 4H), 6.63 (t, *J* = 7.4 Hz, 2H), 6.45 (t, *J* = 7.4 Hz, 4H), 6.32 (d, *J* = 7.7 Hz, 2H), 6.28 (d, *J* = 8.2 Hz, 4H), 6.20 (d, *J* = 7.7 Hz, 4H). MALDI-TOF: *m/z* calcd for C<sub>66</sub>H<sub>42</sub>N<sub>4</sub> [M]<sup>+</sup> 967.1, found 966.4

**Synthesis of *m*-2SPAc-PPM:** This compound was synthesized according to the same procedure as described above for the synthesis of *m*-2SPAc-PPM, except that **S3** (1.20 g, 2.25 mmol) was used as the reactant instead of **S7**. 2DPAc-PPM was obtained as a light-yellow solid (yield = 0.86 g, 89%), and was further purified by temperature-gradient sublimation under vacuum. <sup>1</sup>H NMR (400 MHz, CDCl<sub>3</sub>): δ(ppm) 8.77 (d, *J* = 7.0 Hz, 2H), 8.61 (d, *J* = 7.8 Hz, 2H), 8.45 (s, 2H), 8.18 (s, 1H), 7.94 (t, *J* = 7.5 Hz, 2H), 7.81 (d, *J* = 7.6 Hz, 4H), 7.72 (d, *J* = 7.6 Hz, 2H), 7.57 (d, *J* = 5.6 Hz, 3H), 7.48 (d, *J* = 7.5 Hz, 4H), 7.37 (t, *J* = 7.3 Hz, 4H), 7.18 (dd, *J* = 21.2, 13.5 Hz, 4H), 6.95 (t, *J* = 7.8 Hz, 4H), 6.60 (t, *J* = 7.4 Hz, 4H), 6.46 (t, *J* = 6.7 Hz, 8H). MALDI-TOF: *m/z* calcd for C<sub>72</sub>H<sub>46</sub>N<sub>4</sub> [M]<sup>+</sup> 967.1, found 966.4.

## 2. Supplementary Equations, Figures, and Tables

### 2.1 Equations

The intensity ratio between prompt ( $A_1$ ), delayed ( $A_2$ ), or/and phosphorescent ( $A_3$ ) component were determined using emission life time ( $t_1$ ,  $t_2$ , or/and  $t_3$ ) and fitting parameter ( $B_1$ ,  $B_2$ , or/and  $B_3$ ). As following:

$$I(t) = B_1 e^{-\frac{t}{t_1}} + B_2 e^{-\frac{t}{t_2}} + B_3 e^{-\frac{t}{t_3}} \quad (\text{S1})$$

$$A_1 = \frac{B_1 t_1}{B_1 t_1 + B_2 t_2 + B_3 t_3} \quad (\text{S2})$$

$$A_2 = \frac{B_2 t_2}{B_1 t_1 + B_2 t_2 + B_3 t_3} \quad (\text{S3})$$

$$A_3 = \frac{B_3 t_3}{B_1 t_1 + B_2 t_2 + B_3 t_3} \quad (\text{S4})$$

### 2.2 Figures

MALDI-TOF,CCA,2,20190104

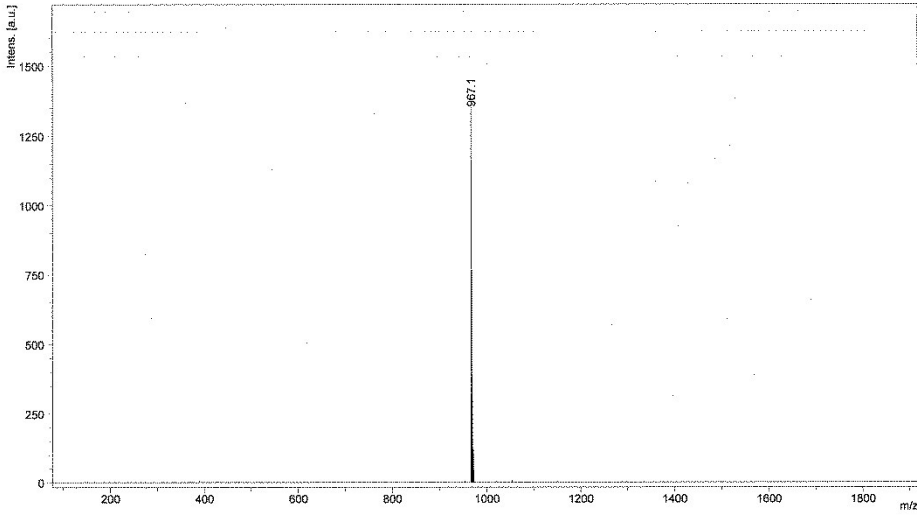

**Fig.S1** Mass spectra of *m*-2SPAc-PPM

## MALDI-TOF, CCA, 1, 20190104

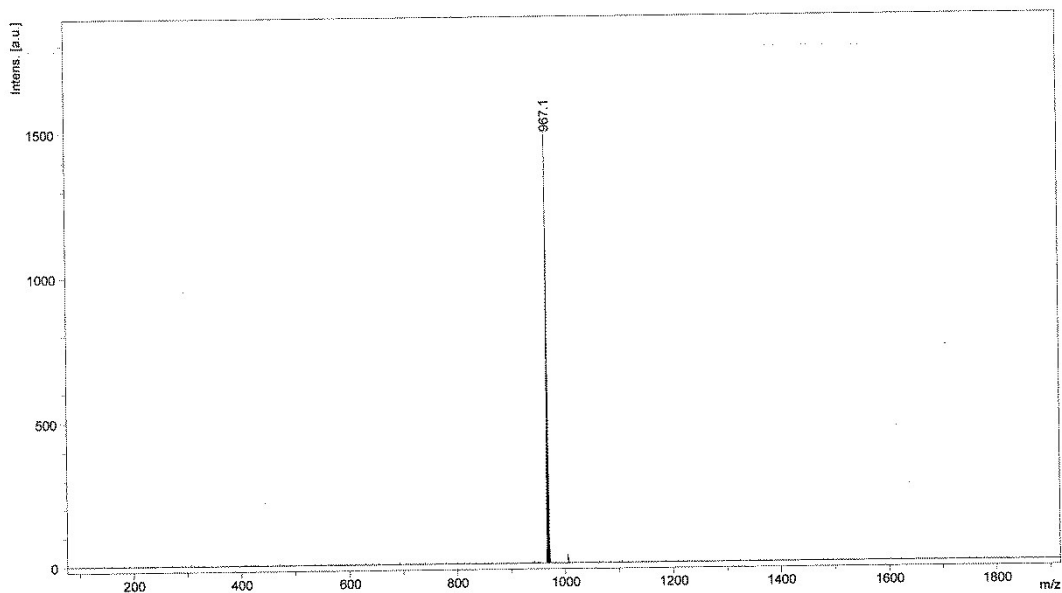

Fig.S2 Mass spectra of *o*-2SPAc-PPM

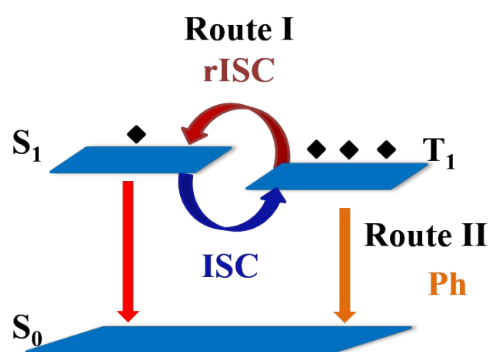

Fig. S3. The triplet exciton dynamic processes for routes I and II.

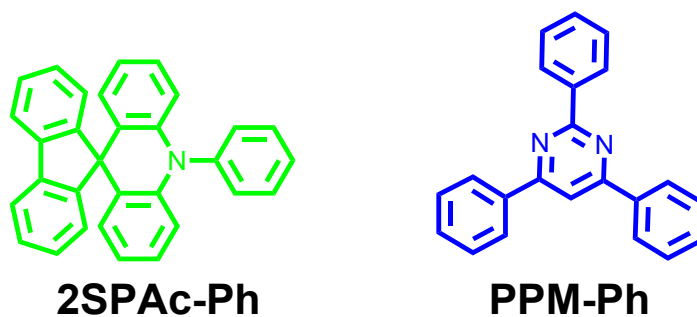



**Fig. S4.** The chemical structures of model donor 2SPAc-Ph and acceptor PPM-Ph.

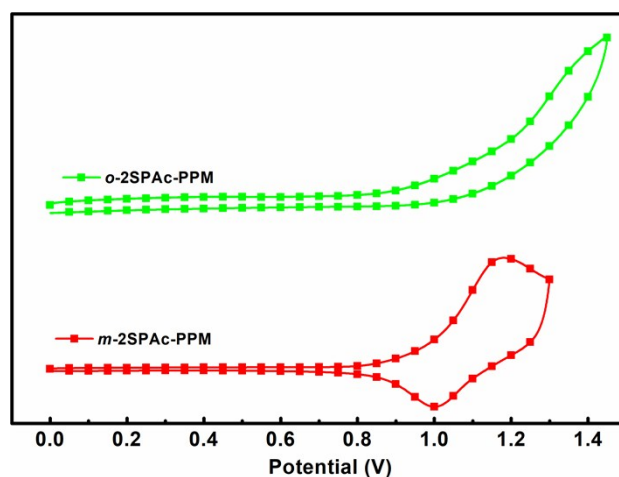

**Fig. S5.** Cyclic voltammogram of *o*-2SPAc-PPM and *m*-2SPAc-PPM.

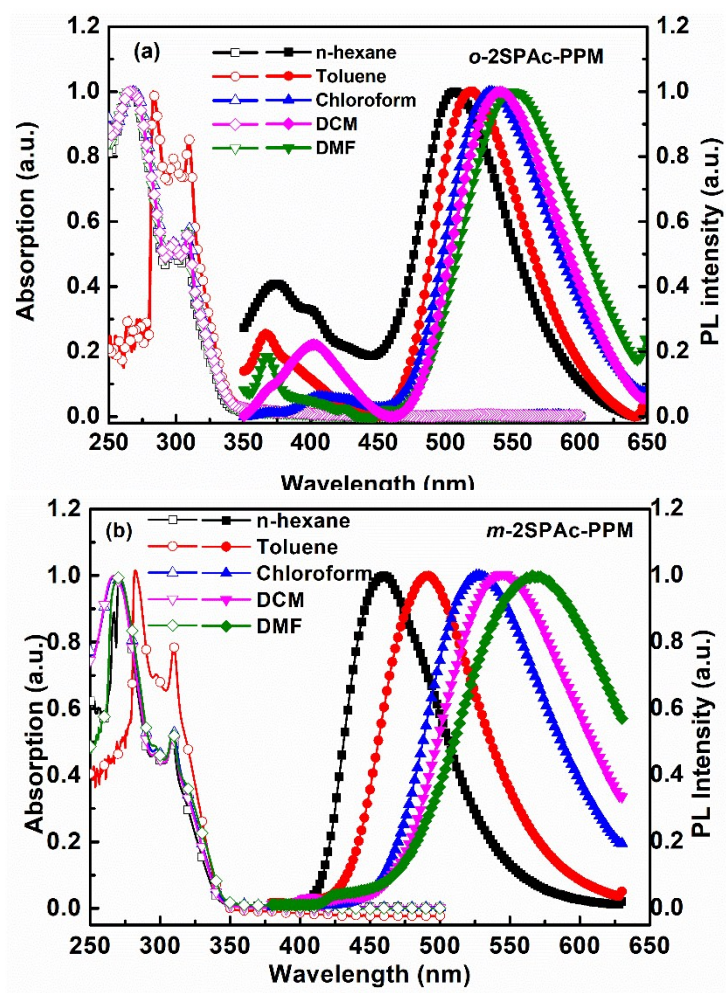

**Fig. S6.** UV-Vis absorption and emission spectra of *o*-2SPAc-PPM (a) and *m*-2SPAc-PPM (b) in various solvent ( $10^{-5}$  M) at room temperature.

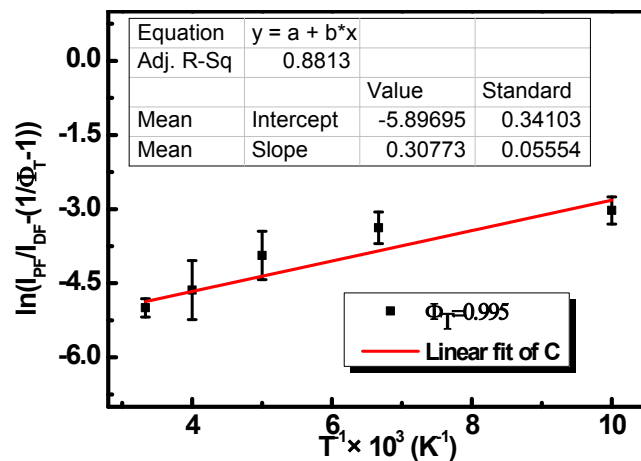

Fig. S7. The Berberan-Santos plot of *o*-2SPAc-PPM.

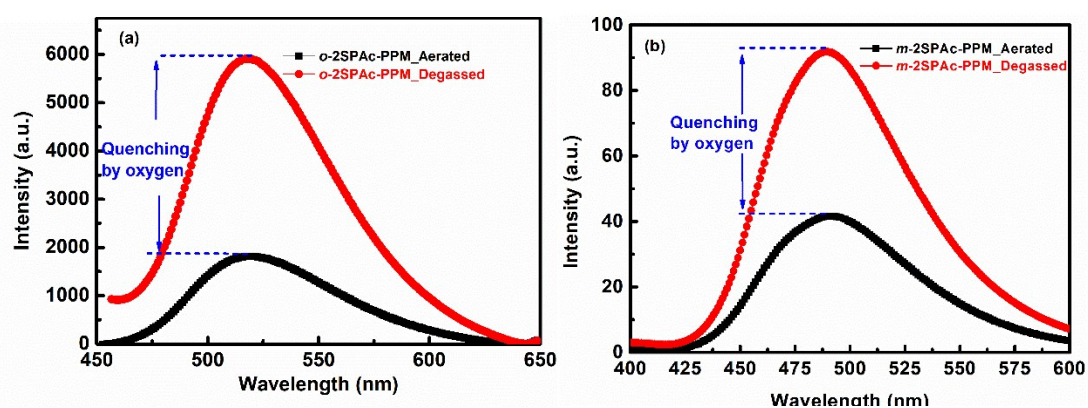

Fig. S8. PL spectra of *o*-2SPAc-PPM (a) and *m*-2SPAc-PPM (b) in degassed ( $N_2$  treatment) and aerated toluene solution.

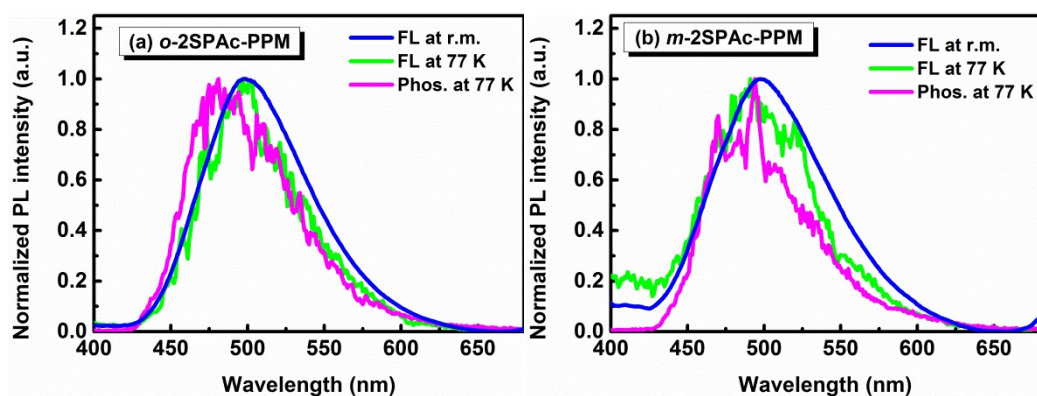

Fig. S9. Fluorescence and phosphorescence spectra of *o*-2SPAc-PPM (a) and *m*-2SPAc-PPM (b) in doped films.

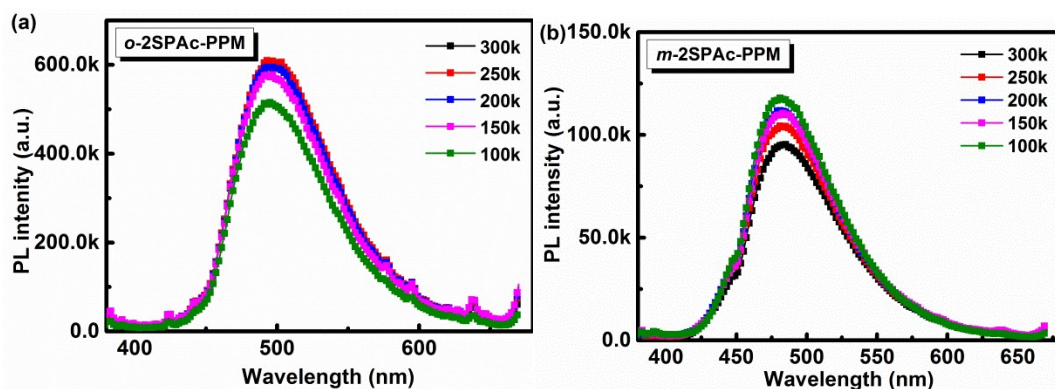

**Fig. S10.** PL spectra of *o*-2SPAc-PPM (a) and *m*-2SPAc-PPM (b) doped films at different temperature (100, 150, 200, 250, and 300 K).

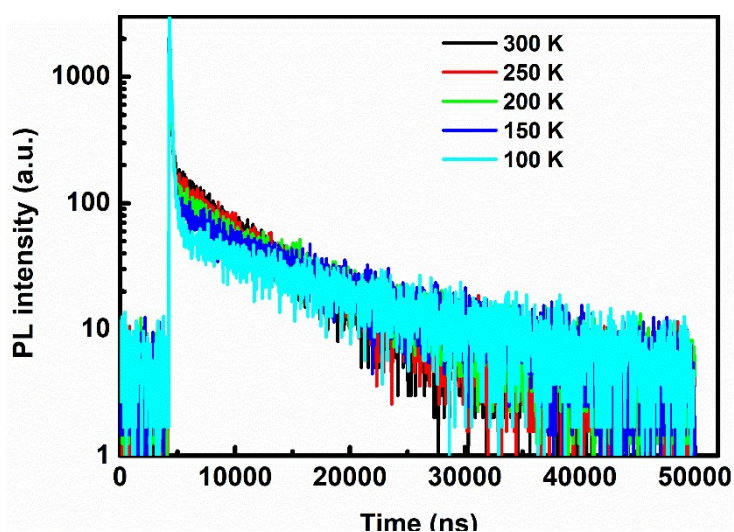

**Fig. S11.** Temperature dependence of PL decay *o*-2SPAc-PPM in 10 wt % doped DPEPO film.

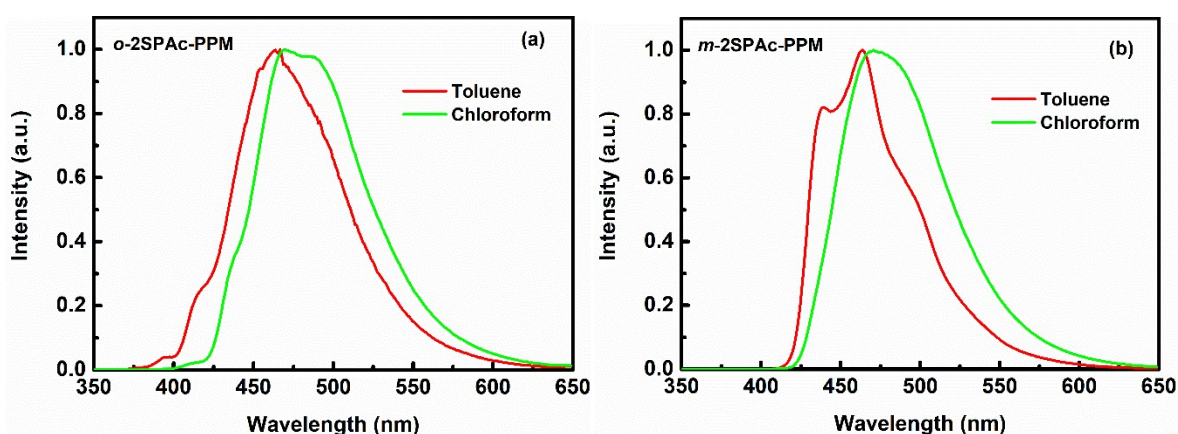

**Fig. S12.** Phosphorescence spectra of *o*-2SPAc-PPM and *m*-2SPAc-PPM in toluene and chloroform solution. The phosphorescence with vibronic structure in toluene solution indicates that the  $T_1$  state has LE character. However, the phosphorescence spectra have the solvatochromism. Thus, the  $T_1$  state originates from CT character.

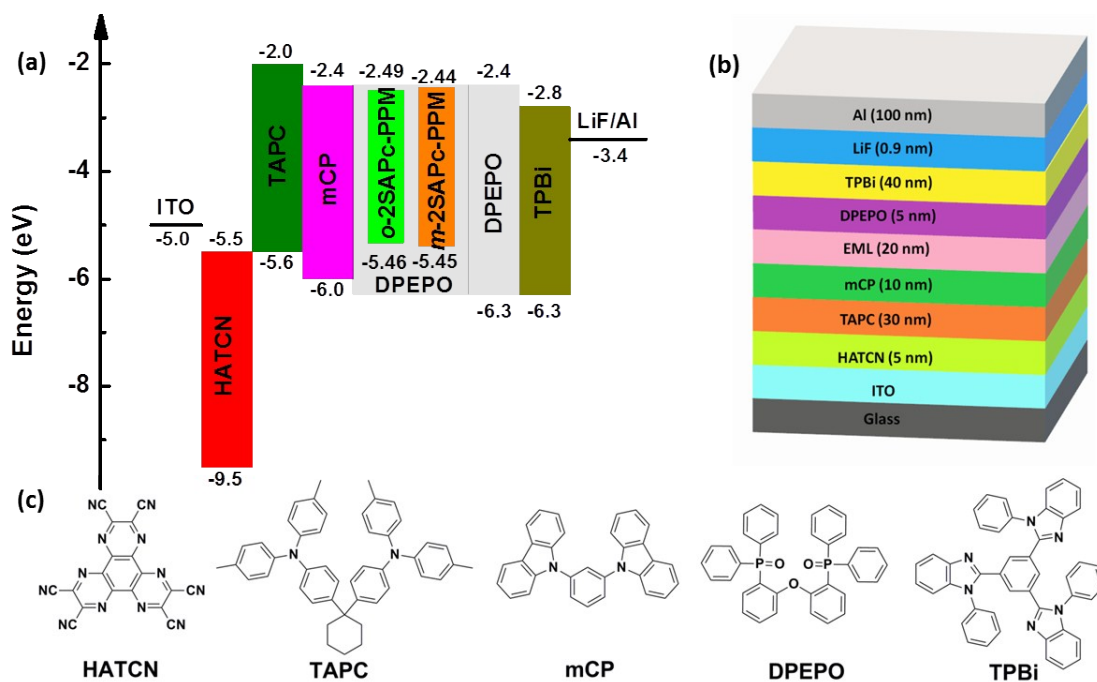

**Fig. S13.** (a) The energy level diagrams, (b) OLED device structure, and (c) the chemical structure of the materials used in the TADF devices.

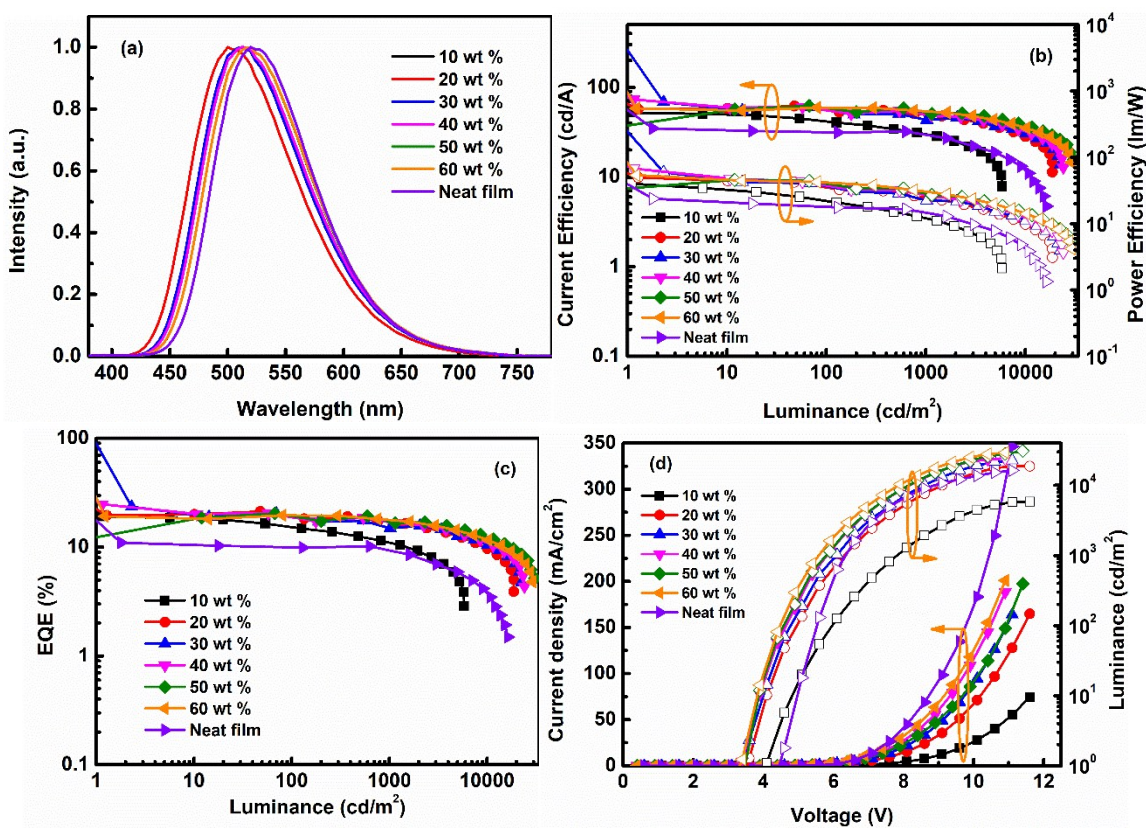

**Fig. S14.** The performance of OLED device with  $x$  wt. % *o*-2SPAc-PPM doped in DPEPO as emitting layer ( $x = 10, 20, 30, 40, 50, 60$ , and neat film): (a) EL spectra of the TADF OLEDs at 8 V. (b) Current efficiency-luminance-power efficiency. (c) External quantum efficiency (EQE) versus current density plots, (d) Current density and luminance versus voltage ( $J$ - $V$ - $L$ ) characteristics.

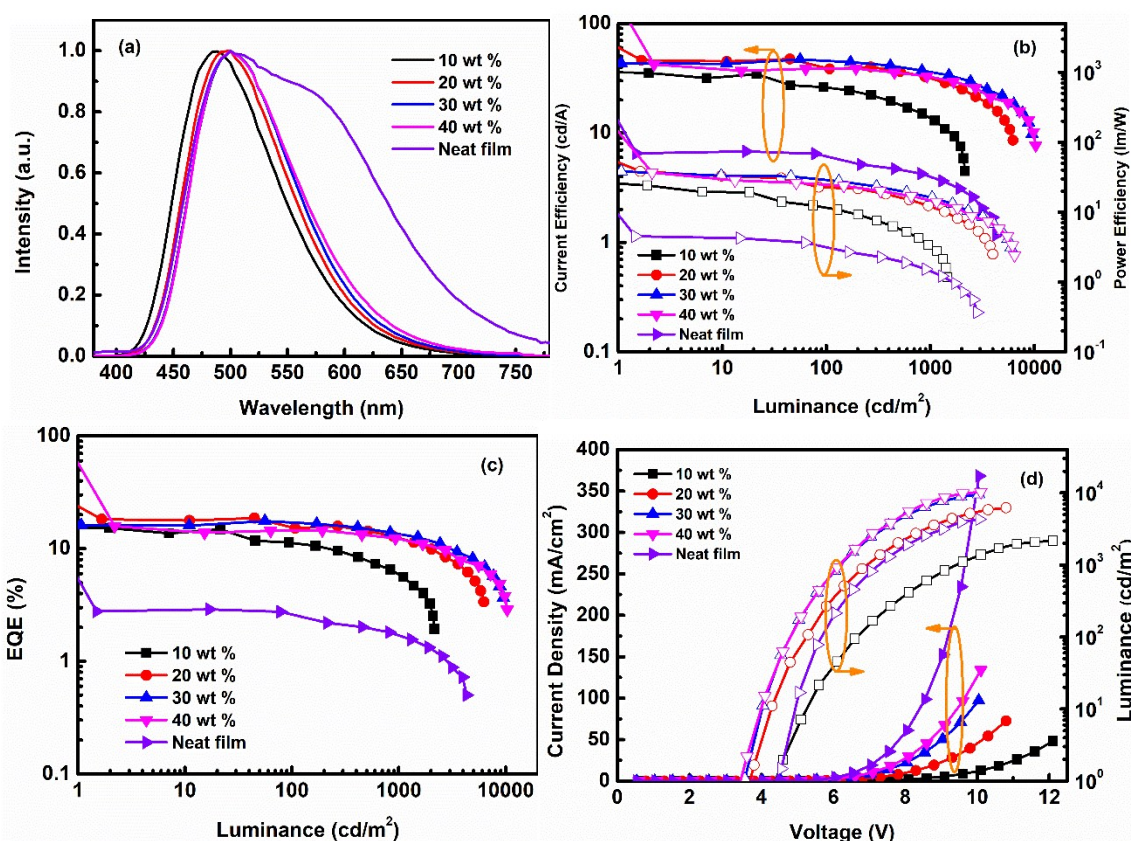

**Fig. S15.** The performance of OLED device with  $x$  wt% *m*-2SPAc-PPM doped in DPEPO as emitting layer ( $x = 10, 20, 30, 40$ , and neat film): (a) EL spectra of the TADF OLEDs at 8 V. (b) Current efficiency-luminance-power efficiency. (c) External quantum efficiency (EQE) versus current density plots, (d) Current density and luminance versus voltage ( $J$ - $V$ - $L$ ) characteristics.

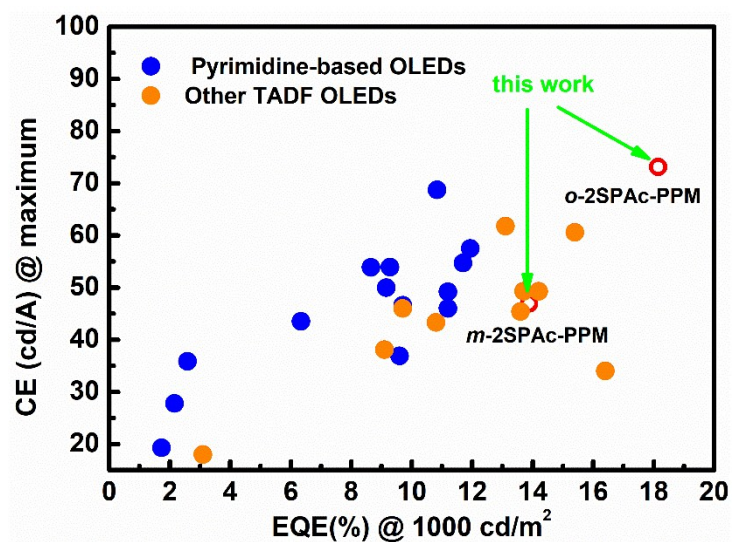

**Fig. S16.** The EQE at 1000 cd m<sup>-2</sup> and the maximum of CE of OLEDs in this work compared with reported pyrimidine-based OLEDs and other efficient TADF OLEDs.

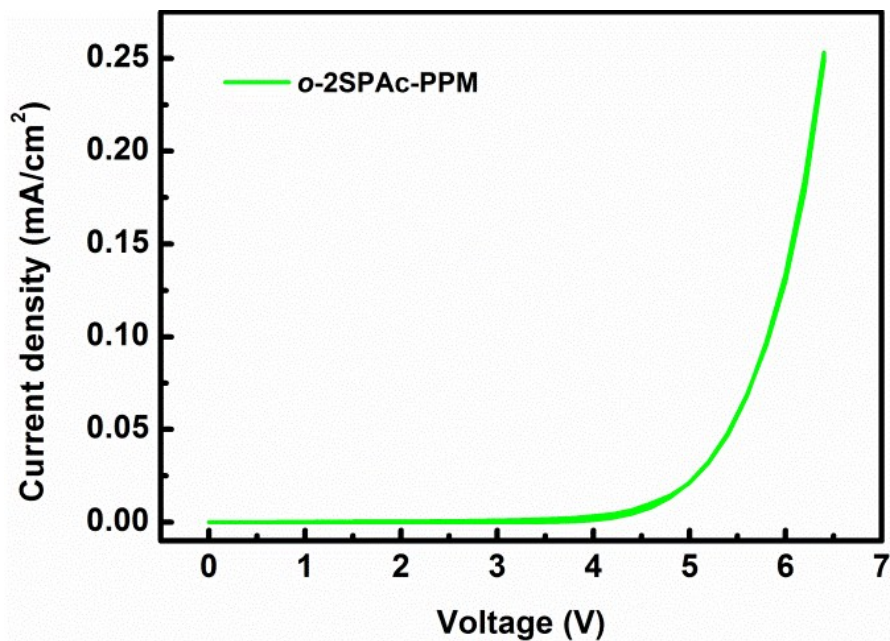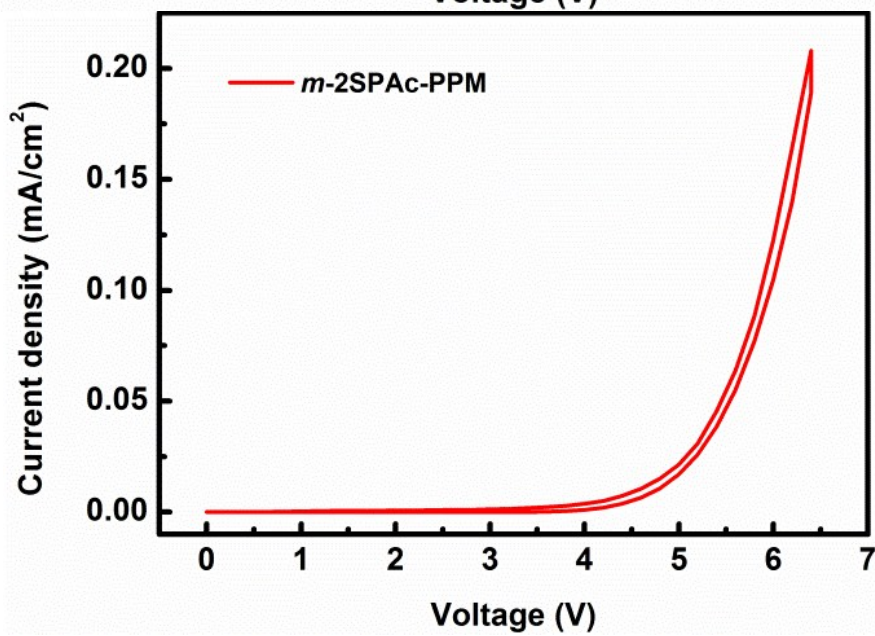

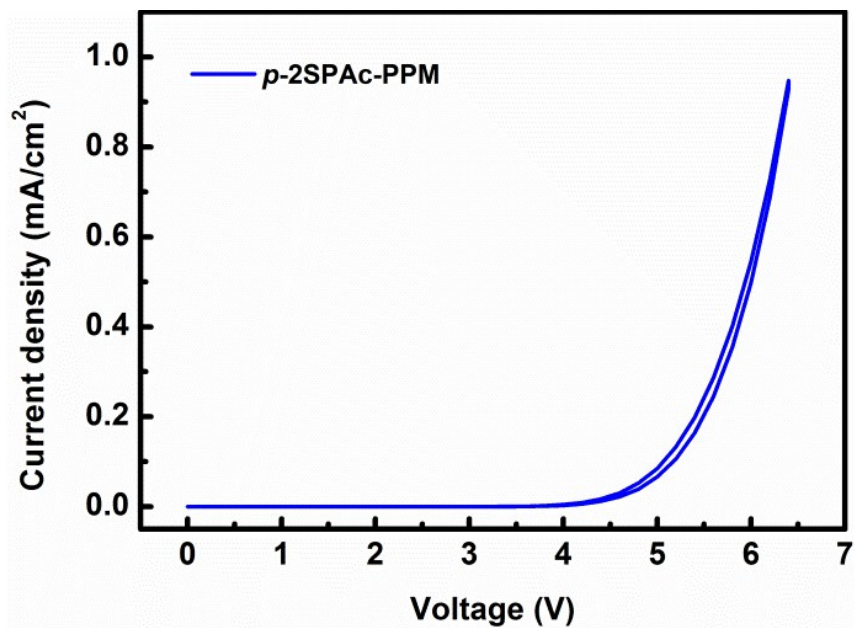

**Fig. S17.** Double sweep of the I-V curve for *p*-2SPAc-PPM, *m*-2SPAc-PPM and *o*-2SPAc-PPM-based OLEDs, respectively.

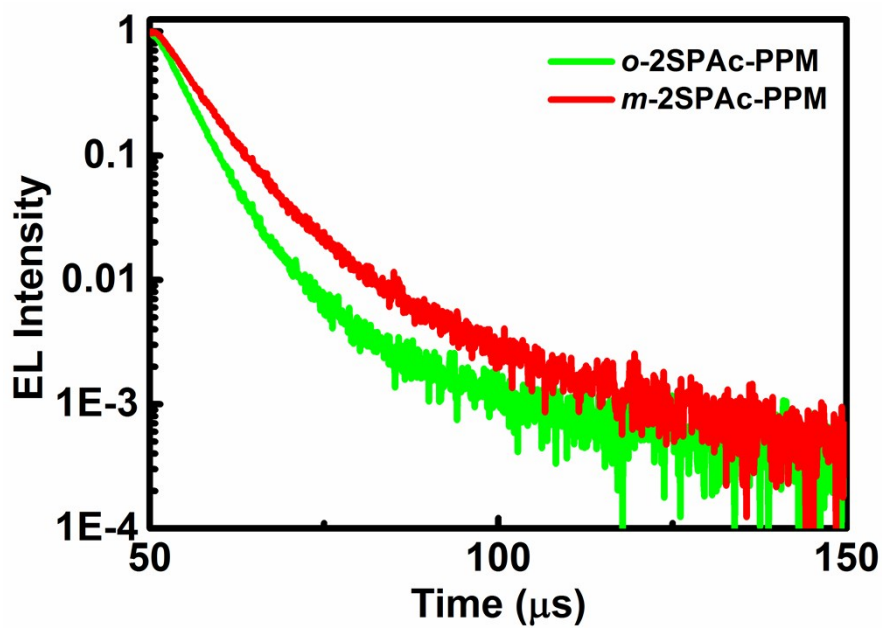

**Fig. S18.** Transient EL delayed curve of *o*-2SPAc-PPM- and *m*-2SPAc-PPM-based TADF OLEDs.



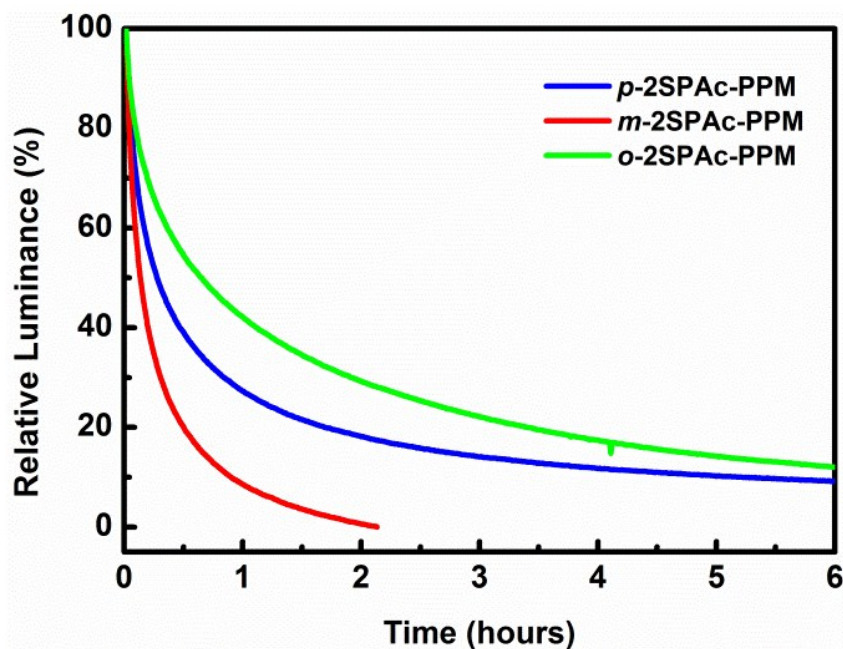

**Fig. S19.** Relative luminance of the OLEDs as a function of operating time at a constant voltage.

The initial luminance was  $500 \text{ cd m}^{-2}$  for each OLED for *p*-2SPAc-PPM, *m*-2SPAc-PPM and *o*-2SPAc-PPM-based OLEDs, respectively.

## 2.3 Tables

**Table S1.** Lifetime data extracted from the transient characterization of 10 wt% *o*- or *m*-2SPAc-PPM: DPEPO film in the time range of 200  $\mu\text{s}$  at different temperatures.

| Compounds           | Parameters                 | 100 K  | 150 K  | 200 K  | 250 K  | 300 K  |
|---------------------|----------------------------|--------|--------|--------|--------|--------|
| <i>m</i> -2SPAc-PPM | $\Phi_{PL}^a$ (%)          | -      | -      | -      | -      | 92.30  |
|                     | $\Phi_{PL}^b$ (%)          | 66.85  | 64.43  | 64.26  | 61.12  | 56.15  |
|                     | $\Phi_F^b$ (%)             | 0.17   | 0.18   | 0.16   | 0.19   | 0.20   |
|                     | $\Phi_{DF}^b$ (%)          | 14.21  | 14.14  | 15.51  | 16.61  | 17.09  |
|                     | $\Phi_{ph}^b$ (%)          | 52.49  | 50.11  | 48.59  | 44.32  | 38.85  |
|                     | $\tau_I^c$ (ns)            | 307.10 | 347.20 | 313.00 | 384.30 | 348.80 |
|                     | $A_1^c$ (%)                | 0.22   | 0.25   | 0.24   | 0.34   | 0.41   |
|                     | $\tau_2$ ( $\mu\text{s}$ ) | 17.72  | 13.98  | 12.00  | 10.77  | 9.36   |
|                     | $A_2$ (%)                  | 20.95  | 21.68  | 23.57  | 27.04  | 30.21  |
|                     | $\tau_3$ ( $\mu\text{s}$ ) | 79.11  | 70.60  | 61.97  | 56.94  | 50.33  |
|                     | $A_3$ (%)                  | 78.83  | 78.06  | 76.19  | 72.63  | 69.38  |
| <i>o</i> -2SPAc-PPM | $\Phi_{PL}^a$ (%)          | -      | -      | -      | -      | 95.50  |
|                     | $\Phi_{PL}^b$ (%)          | 63.09  | 74.26  | 77.00  | 78.65  | 76.41  |
|                     | $\Phi_F^b$ (%)             | 2.80   | 1.72   | 2.48   | 0.46   | 0.40   |
|                     | $\Phi_{DF}^b$ (%)          | 60.29  | 72.53  | 74.52  | 78.20  | 76.01  |
|                     | $\tau_I$ (ns)              | 93.48  | 93.43  | 93.24  | 97.00  | 92.87  |
|                     | $A_1$ (%)                  | 4.45   | 2.33   | 3.22   | 0.58   | 0.53   |
|                     | $\tau_2$ ( $\mu\text{s}$ ) | 11.44  | 9.63   | 8.19   | 6.65   | 5.61   |
|                     | $A_2$ (%)                  | 95.55  | 97.67  | 96.78  | 99.42  | 99.47  |

<sup>a</sup>) Absolute PLQYs for the 10% wt%-doped DPEPO films measured using an integration sphere under  $\text{N}_2$  atmosphere. <sup>b</sup>) Absolute PLQYs for the 10% wt%-doped DPEPO films measured using an integration sphere under

air. <sup>b)</sup>Estimated according to the prompt and delayed components in transient delay curve. <sup>c)</sup>measured in the time range of 200  $\mu$ s.

**Table S2.** Physical properties of 10 wt% *o*-2SPAc-PPM and *m*-2SPAc-PPM doped DPEPO films at 300 K.

| Compounds           | $\tau_p^a)$<br>(ns) | $\tau_d^b)$<br>( $\mu$ s) | $\tau_{Ph}^b)$<br>( $\mu$ s) | $k_P$<br>( $10^7$ s <sup>-1</sup> ) | $k_r^s$<br>( $10^5$ s <sup>-1</sup> ) | $k_{ISC}$<br>( $10^7$ s <sup>-1</sup> ) | $k_{rISC}$<br>( $10^7$ s <sup>-1</sup> ) | $k_{nr}^T$<br>( $10^4$ s <sup>-1</sup> ) | $k_{Ph}^*$<br>( $10^3$ s <sup>-1</sup> ) |
|---------------------|---------------------|---------------------------|------------------------------|-------------------------------------|---------------------------------------|-----------------------------------------|------------------------------------------|------------------------------------------|------------------------------------------|
| <i>m</i> -2SPAc-PPM | 50.12               | 9.35                      | 56.97                        | 2.00                                | 0.40                                  | 2.00                                    | 0.91                                     | 8.90                                     | 7.72                                     |
| <i>o</i> -2SPAc-PPM | 92.45               | 5.36                      | -                            | 1.08                                | 0.43                                  | 1.08                                    | 3.55                                     | 0.80                                     | -                                        |
| <i>p</i> -2SPAc-PPM | 16.80               | 56.94                     | -                            | 5.90                                | 0.22                                  | 5.88                                    | 0.29                                     | 0.68                                     | -                                        |

<sup>a)</sup>Measured in the time range of  $\sim$ 200 ns. <sup>b)</sup> Measured in the time range of 200  $\mu$ s. \*  $k_{Ph} = \Phi_{Ph}/(\tau_{Ph}\Phi_{ISC})$  according to the reference<sup>[1]</sup>, where  $\Phi_{ISC} = k_{ISC}/k_F$

**Table S3.** Summarized device performances of compounds *o*-2SPAc-PPM and *m*-2SPAc-PPM.

| Compounds           | wt%  | EQE <sub>max/100/1000/10000</sub><br>[%] | PE <sub>max/100/1000/10000</sub><br>[lm/W] | CE <sub>max/100/1000/10000</sub><br>[cd/A] |
|---------------------|------|------------------------------------------|--------------------------------------------|--------------------------------------------|
| <i>o</i> -2SPAc-PPM | 10   | 19.15/14.82/11.48/N.A.                   | 40.01/20.82/12.94/N.A.                     | 52.22/40.42/31.30/N.A.                     |
|                     | 20   | 21.23/18.19/17.43/9.71                   | 42.21/32.62/26.14/9.76                     | 61.81/52.96/50.75/28.27                    |
|                     | 30   | 23.52/20.60/14.91/10.53                  | 59.61/40.86/22.30/11.17                    | 68.31/59.82/43.30/30.58                    |
|                     | 40   | 24.80/20.50/16.62/11.69                  | 67.58/43.17/26.10/13.71                    | 73.14/60.46/49.01/34.47                    |
|                     | 50   | 20.43/20.43/16.66/11.83                  | 44.39/44.39/27.00/13.47                    | 62.18/62.18/50.70/36.01                    |
|                     | 60   | 19.58/19.58/18.15/11.61                  | 42.52/42.52/32.11/14.04                    | 59.55/59.55/55.20/35.31                    |
|                     | Neat | 10.09/9.56/9.91/N.A.                     | 21.83/16.99/16.16/-                        | 31.96/30.28/31.38/N.A.                     |
| <i>m</i> -2SPAc-PPM | 10   | 15.28/11.32/6.49/N.A.                    | 24.18/12.49/5.19/N.A.                      | 35.41/26.24/15.03/N.A.                     |
|                     | 20   | 18.22/15.16/12.9/N.A.                    | 38.25/22.82/15.15/N.A.                     | 46.27/38.49/32.78/N.A.                     |
|                     | 30   | 17.58/16.61/13.88/N.A.                   | 32.48/27.65/19.28/N.A.                     | 46.94/44.36/37.07/N.A.                     |
|                     | 40   | 15.84/14.51/12.34/N.A.                   | 36.94/23.89/16.99/N.A.                     | 42.33/38.79/32.99/N.A.                     |
|                     | Neat | 2.78/2.78/1.81/N.A.                      | 4.50/3.66/1.89/N.A.                        | 6.51/6.46/4.24/N.A.                        |

**Table S4.** Recently reported pyrimidine based TADF OLEDs.

| Compounds                        | V<br>(V) | EQE <sub>max/100/1000/10000</sub><br>[%] | PE <sub>max/100/1000/10000</sub><br>[lm/W] | CE <sub>max/100/1000/10000</sub><br>[cd/A] | Ref.             |
|----------------------------------|----------|------------------------------------------|--------------------------------------------|--------------------------------------------|------------------|
| <i>o</i> -2SPAc-PPM <sup>a</sup> | 3.40     | 24.80/20.50/16.62/11.69                  | 67.58/43.17/26.10/13.71                    | 73.14/60.46/49.01/34.47                    | <b>This work</b> |
| <i>o</i> -2SPAc-PPM <sup>b</sup> | 3.40     | 19.58/19.58/18.15/11.61                  | 42.52/42.52/32.11/14.04                    | 59.55/59.55/55.20/35.31                    | <b>This work</b> |
| <i>m</i> -2SPAc-PPM              | 3.50     | 17.58/16.61/13.88/N.A.                   | 32.48/27.65/19.28/N.A.                     | 46.94/44.36/37.07/N.A.                     | <b>This work</b> |
| 2DPAc-PPM                        | 3.60     | 20.80/12.40/N.A./N.A.                    | 31.50/14.60/N.A./N.A.                      | 38.10/23.50/N.A./N.A.                      | [S2]             |
| 2DPAc-MPM                        | 3.60     | 19.00/9.40/N.A./N.A.                     | 27.90/11.10/ N.A./N.A.                     | 32.00/16.50/N.A./N.A.                      | [S2]             |
| Ac-HPM                           | 2.85     | 20.90/17.60/11.70/N.A.                   | 60.30/38.20/20.00/N.A.                     | 54.70/46.00/30.60/N.A.                     | [S3]             |
| Ac-PPM                           | 2.93     | 19.00/16.60/11.20/N.A.                   | 52.80/33.80/17.40/N.A.                     | 49.20/43.20/29.00/N.A.                     | [S3]             |
| Ac-MPM                           | 2.93     | 20.40/16.10/9.70/N.A.                    | 49.90/29.20/13.20/N.A.                     | 46.60/36.80/22.10/N.A.                     | [S3]             |
| Ac-NPM                           | 2.88     | 14.4/5.61/2.16/N.A.                      | 30.50/8.19/1.86/N.A.                       | 27.80/10.80/3.97/N.A.                      | [S4]             |
| Ac-1MHPM                         | 3.16     | 24.00/19.00/11.20/N.A.                   | 45.10/26.20/11.60/N.A.                     | 46.00/26.20/11.60/N.A.                     | [S5]             |
| Ac-2MHPM                         | 3.24     | 19.80/15.90/9.60/N.A.                    | 35.80/20.90/9.50/N.A.                      | 36.90/29.70/18.00/N.A.                     | [S5]             |
| Ac-3MHPM                         | 3.25     | 17.80/10.40/ N.A./N.A.                   | 19.60/7.90/ N.A./N.A.                      | 19.90/11.70/N.A./N.A.                      | [S5]             |
| Ac-46MHPM                        | 2.95     | 11.80/4.48/1.73/N.A.                     | 19.70/5.45/1.29/N.A.                       | 19.30/6.96/2.46/N.A.                       | [S6]             |
| Ac-26MHPM                        | 2.87     | 18.60/11.90/6.34/N.A.                    | 43.50/21.20/8.61/N.A.                      | 43.50/21.20/8.61/N.A.                      | [S6]             |
| CzAc-26MHPM                      | 2.87     | 22.80/14.90/9.28/N.A.                    | 59.20/29.30/14.10/N.A.                     | 53.90/35.30/21.90/N.A.                     | [S6]             |
| T1                               | 3.20     | 7.20/5.60/N.A./N.A.                      | 12.00/8.20/N.A./N.A.                       | 13.40/10.40/N.A./N.A.                      | [S7]             |
| T2                               | 3.00     | 12.60/12.60/N.A./N.A.                    | 29.80/21.00/N.A./N.A.                      | 34.20/28.10/N.A./N.A.                      | [S7]             |
| T3                               | 3.00     | 11.80/4.20/N.A./N.A.                     | 19.60/4.70/N.A./N.A.                       | 18.80/6.50/N.A./N.A.                       | [S7]             |
| T4                               | 3.00     | 11.80/10.3/N.A./N.A.                     | 21.50/15.50/N.A./N.A.                      | 24.00/21.00/N.A./N.A.                      | [S7]             |
| 2SPAc-PPM                        | 3.60     | 31.45/18.34/10.84/N.A.                   | 56.85/23.78/9.55/N.A.                      | 68.77/40.11/23.71/N.A.                     | [S8]             |
| 2SPAc-HPM                        | 3.60     | 25.56/18.86/11.94/N.A.                   | 51.60/26.65/12.98/N.A.                     | 57.50/42.42/26.85/N.A.                     | [S8]             |
| 2SPAc-MPM                        | 3.60     | 24.34/16.14/9.16/N.A.                    | 42.45/20.03/7.68/N.A.                      | 50.00/33.15/18.82/N.A.                     | [S8]             |
| DPAc-4PyPM                       | 4.60     | 24.34/17.53/8.65/N.A.                    | 36.79/17.74/5.89/N.A.                      | 53.89/39.54/19.51/N.A.                     | [S9]             |

|            |      |                       |                      |                       |      |
|------------|------|-----------------------|----------------------|-----------------------|------|
| DPAc-3PyPM | 4.80 | 22.42/11.27/2.59/N.A. | 23.45/7.20/1.04/N.A. | 35.85/18.80/4.45/N.A. | [S9] |
| DPAc-TPPM  | 4.2  | 16.80/6.86/N.A./N.A.  | 19.49/4.90/N.A./N.A. | 26.07/10.93/N.A./N.A. | [S9] |

N.A.: not available. <sup>a</sup>40 wt% *o*-2SPAc-PPM doped DPEPO. <sup>b</sup>60 wt% *o*-2SPAc-PPM doped DPEPO.

**Table S5.** Recently reported efficient TADF OLEDs.

| Compounds   | V (V) | EQE <sub>max/100/1000/10000</sub> [%] | PE <sub>max/100/1000/10000</sub> [lm/W] | CE <sub>max/100/1000/10000</sub> [cd/A] | Ref.  |
|-------------|-------|---------------------------------------|-----------------------------------------|-----------------------------------------|-------|
| DBT-BZ-PXZ  | 3.2   | 19.2/N.A./15.4/N.A.                   | 59.2/N.A./21.8/N.A.                     | 60.6/N.A./48.6/N.A.                     | [S10] |
| DBT-BZ-PTZ  | 3.2   | 15.1/N.A./9.7/N.A.                    | 43.3/N.A./13.6/N.A.                     | 46.0/N.A./29.5/N.A.                     | [S10] |
| 5PXZ-PIDO   | N.A.  | 14.40/N.A./10.80/4.60                 | 33.10/N.A./19.90/5.60                   | 43.30/N.A./32.30/13.50                  | [S11] |
| 5,6PXZ-PIDO | N.A.  | 16.90/N.A./14.20/8.10                 | 38.70/N.A./26.20/10.80                  | 49.30/N.A./26.20/23.60                  | [S11] |
| DCzIPN      | 4.0   | 16.40/N.A./7.60/N.A.                  | 15.90/N.A./4.80/N.A.                    | N.A./N.A./N.A./N.A.                     | [S12] |
| DDCzIPN     | 3.5   | 18.90/N.A./15.80/N.A.                 | 38.30/N.A./21.50/N.A.                   | N.A./N.A./N.A./N.A.                     | [S12] |
| Cz-VPN      | 4.4   | 8.70/4.80/3.10/N.A.                   | 12.30/3.80/1.7/N.A.                     | 18.00/10.00/6.40/N.A.                   | [S13] |
| Ac-VPN      | 4.5   | 18.90/18.00/16.40/N.A.                | 51.70/45.50/41.50/N.A.                  | 34.10/27.10/22.30/N.A.                  | [S13] |
| Px-VPN      | 4.7   | 14.90/14.90/13.60/N.A.                | 26.70/19.90/11.80/N.A.                  | 45.40/43.00/33.20/N.A.                  | [S13] |
| Ac-CNP      | 4.7   | 13.00/12.00/9.10/N.A.                 | 26.10/15.30/9.10/N.A.                   | 38.10/34.10/26.00/N.A.                  | [S13] |
| Px-CNP      | 5.5   | 3.00/3.00/2.80/N.A.                   | 3.10/2.90/1.70/N.A.                     | 5.80/5.80/5.10/N.A.                     | [S13] |
| ACRDSO2     | 3.5   | 19.20/17.60/13.10/N.A.                | N.A./N.A./N.A./N.A.                     | 61.80/N.A./N.A./N.A.                    | [S14] |
| PXZDSO2     | 3.7   | 16.70/16.30/13.70/N.A.                | N.A./N.A./N.A./N.A.                     | 49.30/N.A./N.A./N.A.                    | [S14] |

N.A.: not available.

### Cartesian coordinates of the optimized structures for *o*-2SPAc-PPM

| Center Number | Atomic Number | Atomic Type | Coordinates (Angstroms) |           |           |
|---------------|---------------|-------------|-------------------------|-----------|-----------|
|               |               |             | X                       | Y         | Z         |
| 1             | 7             | 0           | 0.094729                | 2.292336  | -0.203945 |
| 2             | 6             | 0           | -0.530232               | 1.212558  | 0.289505  |
| 3             | 6             | 0           | -0.178991               | -0.067892 | -0.144483 |
| 4             | 6             | 0           | 0.854014                | -0.179418 | -1.085379 |
| 5             | 7             | 0           | 1.458885                | 0.905232  | -1.586765 |
| 6             | 6             | 0           | 1.047901                | 2.099488  | -1.131329 |
| 7             | 6             | 0           | 1.686214                | 3.314417  | -1.703303 |
| 8             | 6             | 0           | 2.630520                | 3.204494  | -2.735197 |
| 9             | 6             | 0           | 3.224155                | 4.345259  | -3.272599 |
| 10            | 6             | 0           | 2.883927                | 5.610115  | -2.787692 |
| 11            | 6             | 0           | 1.942717                | 5.727417  | -1.761513 |
| 12            | 6             | 0           | 1.346240                | 4.589594  | -1.223101 |
| 13            | 6             | 0           | -1.492104               | 1.464691  | 1.419669  |
| 14            | 6             | 0           | 1.234718                | -1.520838 | -1.629721 |
| 15            | 6             | 0           | -0.840915               | 2.105235  | 2.491854  |
| 16            | 6             | 0           | -1.423771               | 2.292326  | 3.734161  |
| 17            | 6             | 0           | -2.706692               | 1.798570  | 3.928948  |
| 18            | 6             | 0           | -3.399359               | 1.208796  | 2.879759  |
| 19            | 6             | 0           | -2.864200               | 1.064491  | 1.578862  |
| 20            | 6             | 0           | 2.543013                | -2.078837 | -1.708742 |
| 21            | 6             | 0           | 2.692565                | -3.241569 | -2.494245 |
| 22            | 6             | 0           | 1.613012                | -3.904155 | -3.068120 |
| 23            | 6             | 0           | 0.318765                | -3.423819 | -2.889242 |
| 24            | 6             | 0           | 0.158255                | -2.234281 | -2.187579 |
| 25            | 6             | 0           | -4.761798               | 3.331832  | -1.743302 |
| 26            | 6             | 0           | -6.103637               | 3.013307  | -1.945125 |
| 27            | 6             | 0           | -6.629688               | 1.853604  | -1.378899 |
| 28            | 6             | 0           | -5.849804               | 1.016977  | -0.573311 |
| 29            | 6             | 0           | -4.506700               | 1.385909  | -0.313147 |
| 30            | 6             | 0           | -3.965642               | 2.514923  | -0.944265 |
| 31            | 6             | 0           | -6.377243               | -0.316957 | -0.014737 |
| 32            | 6             | 0           | -5.184925               | -1.307075 | -0.088068 |
| 33            | 6             | 0           | -3.867879               | -0.844086 | 0.172905  |
| 34            | 7             | 0           | -3.685063               | 0.539851  | 0.514035  |

|    |   |   |           |           |           |
|----|---|---|-----------|-----------|-----------|
| 35 | 6 | 0 | -5.356632 | -2.649713 | -0.447255 |
| 36 | 6 | 0 | -4.271556 | -3.513781 | -0.577041 |
| 37 | 6 | 0 | -2.981218 | -3.034198 | -0.376491 |
| 38 | 6 | 0 | -2.784126 | -1.703309 | -0.016631 |
| 39 | 6 | 0 | -7.593625 | -0.850253 | -0.785035 |
| 40 | 6 | 0 | -8.709146 | -1.010519 | 0.049093  |
| 41 | 6 | 0 | -8.343886 | -0.589609 | 1.400525  |
| 42 | 6 | 0 | -6.995373 | -0.169515 | 1.404961  |
| 43 | 6 | 0 | -7.680721 | -1.165170 | -2.138760 |
| 44 | 6 | 0 | -8.889991 | -1.646433 | -2.651429 |
| 45 | 6 | 0 | -9.999629 | -1.812238 | -1.815494 |
| 46 | 6 | 0 | -9.917145 | -1.495531 | -0.459261 |
| 47 | 6 | 0 | -9.119559 | -0.546945 | 2.560362  |
| 48 | 6 | 0 | -8.546555 | -0.075548 | 3.739930  |
| 49 | 6 | 0 | -7.218085 | 0.349830  | 3.746996  |
| 50 | 6 | 0 | -6.444040 | 0.302448  | 2.580916  |
| 51 | 6 | 0 | 2.224766  | -2.456673 | 2.294556  |
| 52 | 6 | 0 | 3.191387  | -1.935721 | 3.145135  |
| 53 | 6 | 0 | 4.336289  | -1.361303 | 2.606094  |
| 54 | 6 | 0 | 4.520017  | -1.256951 | 1.223359  |
| 55 | 6 | 0 | 3.487966  | -1.683166 | 0.356684  |
| 56 | 6 | 0 | 2.373463  | -2.342279 | 0.913582  |
| 57 | 6 | 0 | 5.851932  | -0.767819 | 0.630531  |
| 58 | 6 | 0 | 6.125118  | -1.612859 | -0.626565 |
| 59 | 6 | 0 | 5.012389  | -1.962603 | -1.462093 |
| 60 | 7 | 0 | 3.703749  | -1.517532 | -1.085069 |
| 61 | 6 | 0 | 7.403054  | -2.094095 | -0.929570 |
| 62 | 6 | 0 | 7.601776  | -2.882692 | -2.060042 |
| 63 | 6 | 0 | 6.529681  | -3.188486 | -2.900944 |
| 64 | 6 | 0 | 5.608608  | -1.494265 | -2.640776 |
| 65 | 6 | 0 | 6.998213  | -0.879689 | 1.642805  |
| 66 | 6 | 0 | 7.596586  | 0.371599  | 1.869270  |
| 67 | 6 | 0 | 6.915863  | 1.374717  | 1.043079  |
| 68 | 6 | 0 | 5.888044  | 0.745701  | 0.313600  |
| 69 | 6 | 0 | 7.466308  | -2.013974 | 2.299316  |
| 70 | 6 | 0 | 8.536994  | -1.890181 | 3.190692  |
| 71 | 6 | 0 | 9.130791  | -0.643343 | 3.419364  |
| 72 | 6 | 0 | 8.665426  | 0.495773  | 2.760693  |
| 73 | 6 | 0 | 7.157602  | 2.742205  | 0.902925  |
| 74 | 6 | 0 | 6.364086  | 3.481458  | 0.022862  |
| 75 | 6 | 0 | 5.345062  | 2.856956  | -0.702770 |
| 76 | 6 | 0 | 5.100833  | 1.485192  | -0.562654 |
| 77 | 1 | 0 | -0.660577 | -0.949880 | 0.247584  |
| 78 | 1 | 0 | 2.889495  | 2.220741  | -3.107779 |
| 79 | 1 | 0 | 3.954513  | 4.241669  | -4.070650 |
| 80 | 1 | 0 | 3.347789  | 6.499417  | -3.207062 |
| 81 | 1 | 0 | 1.672642  | 6.708717  | -1.379727 |
| 82 | 1 | 0 | 0.614546  | 4.669845  | -0.427111 |
| 83 | 1 | 0 | 0.177120  | 2.440268  | 2.318333  |
| 84 | 1 | 0 | -0.880484 | 2.788770  | 4.532389  |
| 85 | 1 | 0 | -3.189999 | 1.873969  | 4.899731  |
| 86 | 1 | 0 | -4.390194 | 0.852905  | 3.076671  |
| 87 | 1 | 0 | 3.683676  | -3.642199 | -2.658022 |
| 88 | 1 | 0 | 1.798626  | -4.800386 | -3.654596 |
| 89 | 1 | 0 | -0.541098 | -3.936456 | -3.309067 |
| 90 | 1 | 0 | -0.832930 | -1.801777 | -2.095981 |
| 91 | 1 | 0 | -4.325360 | 4.206336  | -2.218066 |
| 92 | 1 | 0 | -6.734582 | 3.649361  | -2.559531 |
| 93 | 1 | 0 | -7.662783 | 1.585152  | -1.572099 |
| 94 | 1 | 0 | -2.914023 | 2.745391  | -0.810240 |
| 95 | 1 | 0 | -6.356445 | -3.025144 | -0.634249 |

|     |   |   |            |           |           |
|-----|---|---|------------|-----------|-----------|
| 96  | 1 | 0 | -4.438127  | -4.552730 | -0.847070 |
| 97  | 1 | 0 | -2.122769  | -3.688070 | -0.503022 |
| 98  | 1 | 0 | -1.787901  | -1.330509 | 0.137007  |
| 99  | 1 | 0 | -6.821343  | -1.037484 | -2.791309 |
| 100 | 1 | 0 | -8.967502  | -1.891676 | -3.707154 |
| 101 | 1 | 0 | -10.932888 | -2.188650 | -2.225895 |
| 102 | 1 | 0 | -10.780957 | -1.623595 | 0.187930  |
| 103 | 1 | 0 | -10.156331 | -0.873488 | 2.545512  |
| 104 | 1 | 0 | -9.134693  | -0.038416 | 4.652870  |
| 105 | 1 | 0 | -6.775999  | 0.726181  | 4.665899  |
| 106 | 1 | 0 | -5.428828  | 0.644511  | 2.610703  |
| 107 | 1 | 0 | 1.351548   | -2.961755 | 2.698042  |
| 108 | 1 | 0 | 3.073833   | -2.000225 | 4.223182  |
| 109 | 1 | 0 | 5.112529   | -1.001113 | 3.271789  |
| 110 | 1 | 0 | 1.620786   | -2.760255 | 0.266090  |
| 111 | 1 | 0 | 8.234989   | -1.854789 | -0.277440 |
| 112 | 1 | 0 | 8.593504   | -3.281005 | -2.266105 |
| 113 | 1 | 0 | 6.667995   | -3.818177 | -3.775844 |
| 114 | 1 | 0 | 5.066373   | -0.790189 | -3.272600 |
| 115 | 1 | 0 | 7.007245   | -2.982850 | 2.123540  |
| 116 | 1 | 0 | 8.910255   | -2.769290 | 3.708936  |
| 117 | 1 | 0 | 9.961673   | -0.561706 | 4.115174  |
| 118 | 1 | 0 | 9.129523   | 1.462045  | 2.940559  |
| 119 | 1 | 0 | 7.953170   | 3.225054  | 1.464940  |
| 120 | 1 | 0 | 6.540675   | 4.546818  | -0.099355 |
| 121 | 1 | 0 | 4.729917   | 3.439577  | -1.383086 |
| 122 | 1 | 0 | 4.296897   | 1.023321  | -1.124115 |

-----  
Cartesian coordinates of the optimized structures for *m*-2SPAc-PPM .

| Center<br>Number | Atomic<br>Number | Atomic<br>Type | Coordinates (Angstroms) |           |           |
|------------------|------------------|----------------|-------------------------|-----------|-----------|
|                  |                  |                | X                       | Y         | Z         |
| 1                | 6                | 0              | -1.139483               | -4.156052 | -0.401910 |
| 2                | 6                | 0              | -1.141919               | -2.763186 | -0.400996 |
| 3                | 6                | 0              | -0.000044               | -2.051697 | 0.000140  |
| 4                | 6                | 0              | 1.141811                | -2.763210 | 0.401286  |
| 5                | 6                | 0              | 1.139340                | -4.156076 | 0.402219  |
| 6                | 6                | 0              | -0.000080               | -4.857162 | 0.000160  |
| 7                | 6                | 0              | -0.000025               | -0.566250 | 0.000126  |
| 8                | 7                | 0              | 1.161526                | 0.053012  | 0.265010  |
| 9                | 6                | 0              | 1.164024                | 1.394554  | 0.282223  |
| 10               | 6                | 0              | 0.000006                | 2.118798  | 0.000130  |
| 11               | 6                | 0              | -1.164021               | 1.394585  | -0.281990 |
| 12               | 7                | 0              | -1.161552               | 0.053038  | -0.264776 |
| 13               | 6                | 0              | 2.455720                | 2.059730  | 0.598727  |
| 14               | 6                | 0              | -2.455696               | 2.059778  | -0.598532 |
| 15               | 6                | 0              | 3.657985                | 1.367375  | 0.387259  |
| 16               | 6                | 0              | 4.884178                | 1.968400  | 0.669451  |
| 17               | 6                | 0              | 4.925082                | 3.270796  | 1.179544  |
| 18               | 6                | 0              | 3.734771                | 3.963083  | 1.401901  |
| 19               | 6                | 0              | 2.509282                | 3.364693  | 1.112606  |
| 20               | 6                | 0              | -2.509217               | 3.364749  | -1.112413 |
| 21               | 6                | 0              | -3.734679               | 3.963147  | -1.401782 |
| 22               | 6                | 0              | -4.925013               | 3.270868  | -1.179491 |
| 23               | 6                | 0              | -4.884150               | 1.968477  | -0.669401 |
| 24               | 6                | 0              | -3.657977               | 1.367438  | -0.387132 |
| 25               | 7                | 0              | 6.104689                | 1.248945  | 0.437674  |
| 26               | 7                | 0              | -6.104707               | 1.249069  | -0.437706 |
| 27               | 6                | 0              | 6.761130                | 1.389141  | -0.799537 |
| 28               | 6                | 0              | 7.960634                | 0.699899  | -1.063893 |

|    |   |   |            |           |           |
|----|---|---|------------|-----------|-----------|
| 29 | 6 | 0 | 8.609123   | -0.244093 | -0.045500 |
| 30 | 6 | 0 | 7.817623   | -0.293766 | 1.266094  |
| 31 | 6 | 0 | 6.624880   | 0.429944  | 1.458069  |
| 32 | 6 | 0 | -6.760609  | 1.388399  | 0.799885  |
| 33 | 6 | 0 | -7.959822  | 0.698717  | 1.064406  |
| 34 | 6 | 0 | -8.608866  | -0.244420 | 0.045587  |
| 35 | 6 | 0 | -7.817159  | -0.294308 | -1.265879 |
| 36 | 6 | 0 | -6.624637  | 0.429737  | -1.457966 |
| 37 | 6 | 0 | 6.219010   | 2.227851  | -1.796180 |
| 38 | 6 | 0 | 6.852442   | 2.382877  | -3.022209 |
| 39 | 6 | 0 | 8.043744   | 1.706317  | -3.289518 |
| 40 | 6 | 0 | 8.576609   | 0.877159  | -2.309521 |
| 41 | 6 | 0 | 8.293821   | -1.093678 | 2.313024  |
| 42 | 6 | 0 | 7.630044   | -1.195034 | 3.529892  |
| 43 | 6 | 0 | 6.448778   | -0.474194 | 3.713223  |
| 44 | 6 | 0 | 5.952250   | 0.327737  | 2.693999  |
| 45 | 6 | 0 | -6.218259  | 2.226714  | 1.796739  |
| 46 | 6 | 0 | -6.851123  | 2.380830  | 3.023174  |
| 47 | 6 | 0 | -8.042072  | 1.703730  | 3.290698  |
| 48 | 6 | 0 | -8.575204  | 0.875028  | 2.310463  |
| 49 | 6 | 0 | -8.293149  | -1.094485 | -2.312696 |
| 50 | 6 | 0 | -7.629375  | -1.195794 | -3.529570 |
| 51 | 6 | 0 | -6.448323  | -0.474632 | -3.713015 |
| 52 | 6 | 0 | -5.952000  | 0.327562  | -2.693897 |
| 53 | 6 | 0 | 10.078076  | 0.140422  | 0.209266  |
| 54 | 6 | 0 | 10.947348  | -0.896412 | -0.178354 |
| 55 | 6 | 0 | 10.144645  | -2.010394 | -0.704144 |
| 56 | 6 | 0 | 8.784478   | -1.655252 | -0.637049 |
| 57 | 6 | 0 | -10.077433 | 0.141503  | -0.209409 |
| 58 | 6 | 0 | -10.947719 | -0.894692 | 0.177647  |
| 59 | 6 | 0 | -10.146129 | -2.009561 | 0.703260  |
| 60 | 6 | 0 | -8.785631  | -1.655605 | 0.636602  |
| 61 | 6 | 0 | 10.579066  | 1.320950  | 0.743834  |
| 62 | 6 | 0 | 11.962770  | 1.464439  | 0.891741  |
| 63 | 6 | 0 | 12.829587  | 0.434947  | 0.507625  |
| 64 | 6 | 0 | 12.328992  | -0.752704 | -0.029992 |
| 65 | 6 | 0 | 10.526262  | -3.254277 | -1.212533 |
| 66 | 6 | 0 | 9.536019   | -4.135804 | -1.651163 |
| 67 | 6 | 0 | 8.184181   | -3.779904 | -1.583012 |
| 68 | 6 | 0 | 7.801281   | -2.534358 | -1.074101 |
| 69 | 6 | 0 | -10.577238 | 1.322657  | -0.743697 |
| 70 | 6 | 0 | -11.960778 | 1.467420  | -0.891901 |
| 71 | 6 | 0 | -12.828602 | 0.438564  | -0.508360 |
| 72 | 6 | 0 | -12.329196 | -0.749714 | 0.028979  |
| 73 | 6 | 0 | -10.528973 | -3.253268 | 1.211164  |
| 74 | 6 | 0 | -9.539618  | -4.135817 | 1.649740  |
| 75 | 6 | 0 | -8.187447  | -3.781099 | 1.582016  |
| 76 | 6 | 0 | -7.803321  | -2.535729 | 1.073601  |
| 77 | 1 | 0 | -2.028191  | -4.695659 | -0.718193 |
| 78 | 1 | 0 | -2.020921  | -2.211164 | -0.713912 |
| 79 | 1 | 0 | 2.020828   | -2.211206 | 0.714193  |
| 80 | 1 | 0 | 2.028035   | -4.695700 | 0.718508  |
| 81 | 1 | 0 | -0.000095  | -5.944075 | 0.000166  |
| 82 | 1 | 0 | 0.000016   | 3.201189  | 0.000154  |
| 83 | 1 | 0 | 3.627491   | 0.355779  | -0.001061 |
| 84 | 1 | 0 | 5.885923   | 3.726241  | 1.399362  |
| 85 | 1 | 0 | 3.761596   | 4.969727  | 1.809255  |
| 86 | 1 | 0 | 1.592082   | 3.908704  | 1.316866  |
| 87 | 1 | 0 | -1.591998  | 3.908749  | -1.316619 |
| 88 | 1 | 0 | -3.761473  | 4.969792  | -1.809135 |
| 89 | 1 | 0 | -5.885840  | 3.726314  | -1.399365 |

|     |   |   |            |           |           |
|-----|---|---|------------|-----------|-----------|
| 90  | 1 | 0 | -3.627506  | 0.355837  | 0.001179  |
| 91  | 1 | 0 | 5.294434   | 2.758298  | -1.605115 |
| 92  | 1 | 0 | 6.409128   | 3.035871  | -3.769403 |
| 93  | 1 | 0 | 8.547691   | 1.820273  | -4.244658 |
| 94  | 1 | 0 | 9.501461   | 0.342494  | -2.506436 |
| 95  | 1 | 0 | 9.213757   | -1.650089 | 2.157742  |
| 96  | 1 | 0 | 8.027013   | -1.825378 | 4.320046  |
| 97  | 1 | 0 | 5.906673   | -0.533023 | 4.653328  |
| 98  | 1 | 0 | 5.034370   | 0.880154  | 2.852009  |
| 99  | 1 | 0 | -5.293944  | 2.757560  | 1.605514  |
| 100 | 1 | 0 | -6.407641  | 3.033535  | 3.770522  |
| 101 | 1 | 0 | -8.545554  | 1.816948  | 4.246171  |
| 102 | 1 | 0 | -9.499818  | 0.339994  | 2.507506  |
| 103 | 1 | 0 | -9.212925  | -1.651139 | -2.157324 |
| 104 | 1 | 0 | -8.026197  | -1.826327 | -4.319647 |
| 105 | 1 | 0 | -5.906212  | -0.533432 | -4.653118 |
| 106 | 1 | 0 | -5.034266  | 0.880197  | -2.851987 |
| 107 | 1 | 0 | 9.906848   | 2.120879  | 1.043275  |
| 108 | 1 | 0 | 12.367900  | 2.382685  | 1.308569  |
| 109 | 1 | 0 | 13.902298  | 0.560810  | 0.628759  |
| 110 | 1 | 0 | 13.006769  | -1.549307 | -0.326593 |
| 111 | 1 | 0 | 11.575053  | -3.535241 | -1.267775 |
| 112 | 1 | 0 | 9.817800   | -5.107044 | -2.049270 |
| 113 | 1 | 0 | 7.425375   | -4.476792 | -1.928816 |
| 114 | 1 | 0 | 6.750825   | -2.259900 | -1.022674 |
| 115 | 1 | 0 | -9.904235  | 2.122090  | -1.042699 |
| 116 | 1 | 0 | -12.364994 | 2.386169  | -1.308511 |
| 117 | 1 | 0 | -13.901170 | 0.565418  | -0.629727 |
| 118 | 1 | 0 | -13.007755 | -1.545820 | 0.325130  |
| 119 | 1 | 0 | -11.578028 | -3.533308 | 1.266071  |
| 120 | 1 | 0 | -9.822356  | -5.106933 | 2.047470  |
| 121 | 1 | 0 | -7.429344  | -4.478776 | 1.927768  |
| 122 | 1 | 0 | -6.752611  | -2.262183 | 1.022516  |

### 3. References

- [S1] W. J. Zhao, Z. K. He, J. W. Y. Lam, Q. Peng, H. L. Ma, Z. G. Shuai, G. X. Bai, J. H. Hao, B. Z. Tang, *Chem*, **1**, 592.
- [S2] B. W. Li, Z. Y. Li, T. P. Hu, Y. Zhang, Y. Wang, Y. P. Yi, F. Y. Guo, L. C. Zhao, *J. Mater. Chem. C* **2018**, *6*, 2351.
- [S3] I. S. Park, J. Lee, T. Yasud, *J. Mater. Chem. C* **2016**, *4*, 7911.
- [S4] R. Komatsu, H. Sasabe, Y. Seino, K. Nakao, J. Kido, *J. Mater. Chem. C* **2016**, *4*, 2274.
- [S5] R. Komatsu, H. Sasabe, K. Nakao, Y. Hayasaka, T. Ohsawa, J. Kido, *Adv. Opt. Mater.* **2017**, *5*, 1600675.
- [S6] R. Komatsu, T. Ohsawa, H. Sasabe, K. Nakao, Y. Hayasaka, J. Kido, *ACS Appl. Mater. Interfaces*, **2017**, *9*, 4742.
- [S7] P. Ganesan, R. Ranganathan, Y. Chi, X. K. Liu, C.-S. Lee, S.-H. Liu, G.-H. Lee, T.-C. Lin, Y.-T. Chen, P.-T. Chou, *Chem. Eur. J.* **2017**, *23*, 2858.
- [S8] K. Nakao, H. Sasabe, R. Komatsu, Y. Hayasaka, T. Ohsawa, J. Kido, *Adv. Opt. Mater.* **2017**, *5*, 1600843.
- [S9] Q. Zhang, S. Q. Sun, X. L. Lv, W. Liu, H. X. Zeng, R. D. Guo, S. F. Ye, P. P. Leng, S. P. Xiang, L. Wang, *Mater. Chem. Front.* **2018**, *2*, 2054.
- [S10] J. J. Guo, X. L. Li, H. Nie, W. W. Luo, R. R. Hu, A. J. Qin, Z. J. Zhao, S. J. Su, B. Z. Tang, *Chem. Mater.* **2017**, *29*, 3623.

- [S11] Y. P. Xiang, Z. L. Zhu, D. J. Xie, S. L. Gong, K. L. Wu, G. H. Xie, C.-S. Lee, C. L. Yang, *J. Mater. Chem. C*, **2018**, *6*, 7111.
- [S12] Y. J. Cho, S. K. Jeon, B. D. Chin, E. Yu, J. Y. Lee, *Angew. Chem., Intl. Ed.* **2015**, *54*, 5201.
- [S13] I. S. Park, S. Y. Lee, C. Adachi, T. Yasuda, *Adv. Funct. Mater.* **2016**, *26*, 1813.
- [S14] G. Z. Xie, X. L. Li, D. J. Chen, Z. H. Wang, X. Y. Cai, D. C. Chen, Y. C. Li, K. K. Liu, Y. Cao, S. J. Su, *Adv. Mater.* **2016**, *28*, 181.
